# Supplementary material for: Drug Utilization and Medical Cost Study Focusing on Moisturizers in Cancer Patients Treated with Molecular Targeted Therapy: A Retrospective Observational Study Using Data from a Japanese Claims Database
Source: Springer Nature journal article supplement (doi:10.1007/s13555-022-00712-2), 2022-04-01
Supplement: MOESM1 [file 20299694]

**Drug Utilization and Medical Cost Study Focusing on Moisturizers in Cancer Patients Treated with Molecular Targeted Therapy: A Retrospective Observational Study Using Data from a Japanese Claims Database**

Yoshio Kiyohara<sup>1</sup> • Toshiya Matsuzaki<sup>2</sup> • Lida Teng<sup>2</sup> • Momoyo Kishida<sup>3</sup> • Akira Kanakubo<sup>3</sup> • Anastasiia Motrunich<sup>4</sup> • Yoshie Onishi<sup>5</sup> • Ataru Igarashi<sup>2,6</sup>

<sup>1</sup>Dermatology Division, Shizuoka Cancer Center, Shizuoka, Japan

<sup>2</sup>Department of Health Economics and Outcomes Research, Graduate School of Pharmaceutical Sciences, The University of Tokyo, Japan

<sup>3</sup>Medical Affairs Department, Maruho Co., Ltd., Osaka, Japan

<sup>4</sup>Creativ-Ceutical, Rotterdam, The Netherlands

<sup>5</sup>Creativ-Ceutical K.K., Tokyo, Japan

<sup>6</sup>Unit of Public Health and Preventive Medicine, Yokohama City University School of Medicine, Kanagawa, Japan

**Corresponding author:**

Akira Kanakubo

Medical Affairs Department, Maruho Co., Ltd.

1-11-1, Nakatsu, Kita-ku, Osaka, 531-0071, Japan

E-mail: kanakubo\_dss@mii.maruho.co.jp

Fax: +81-(0)6-6371-8927

Tel: +81-(0)6-6371-8913

**Supplementary Figure S1** Timing of moisturizer prescriptions of group M

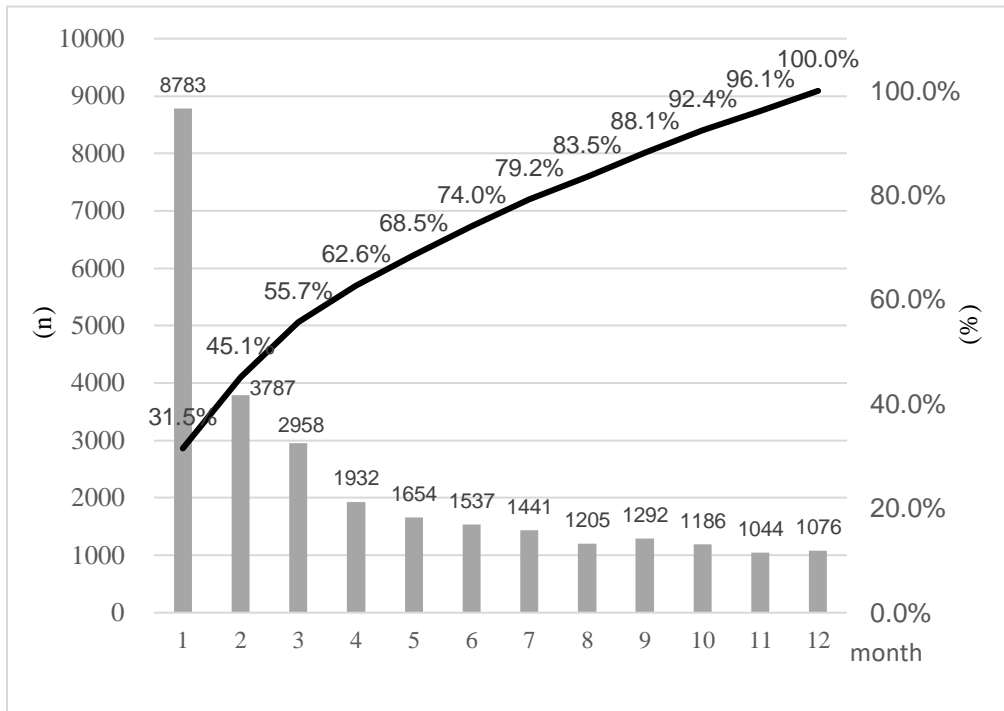

**Supplementary Figure S2** Changes in the proportion of moisturizer users over time in the molecular targeted therapy (MTT) groups

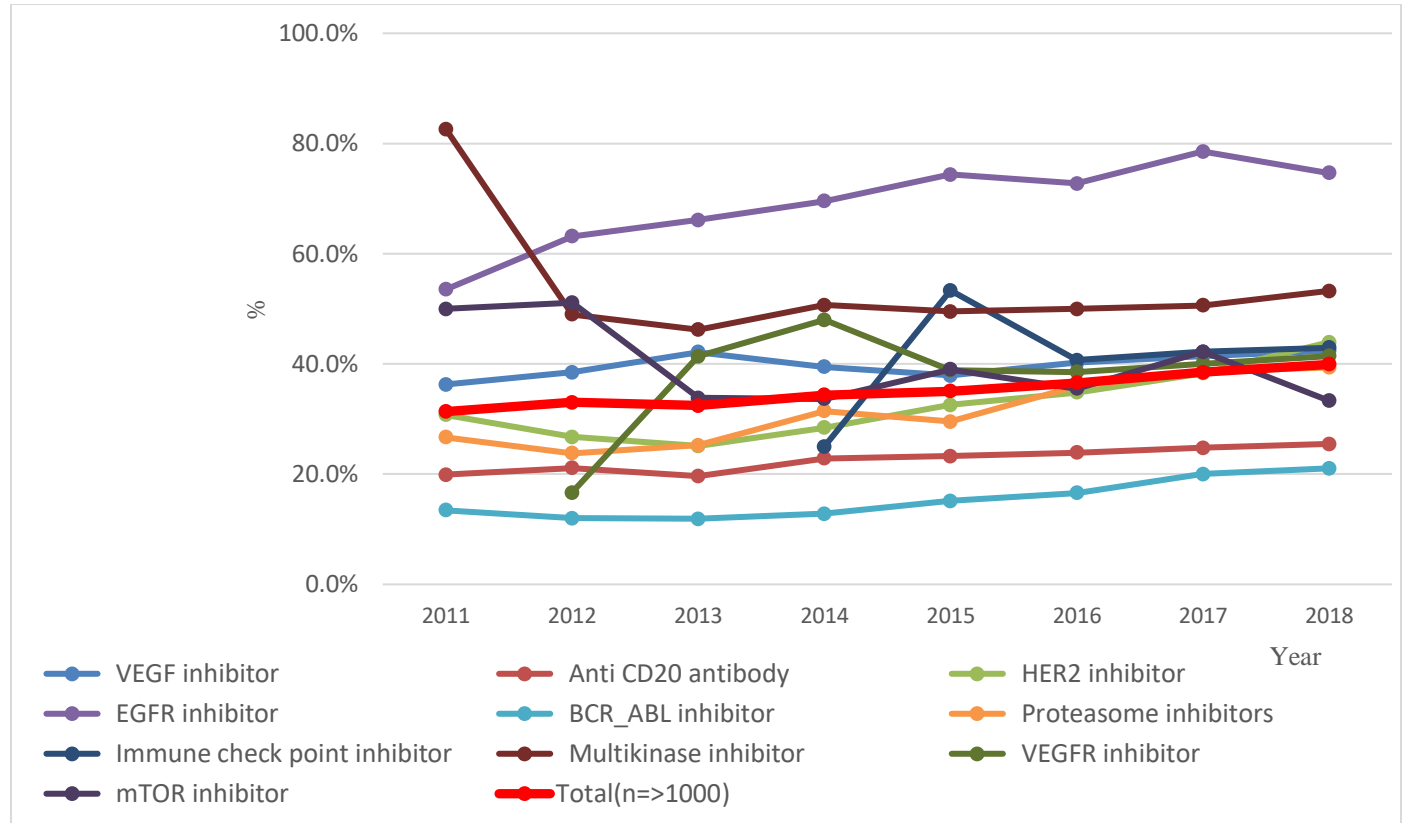

|                              | 2011  | 2012  | 2013  | 2014  | 2015  | 2016  | 2017  | 2018  |
|------------------------------|-------|-------|-------|-------|-------|-------|-------|-------|
| VEGF inhibitor               | 36.3% | 38.5% | 42.2% | 39.5% | 37.9% | 40.2% | 41.4% | 42.4% |
| Anti CD20 antibody           | 19.9% | 21.1% | 19.6% | 22.8% | 23.3% | 23.9% | 24.8% | 25.5% |
| HER2 inhibitor               | 30.8% | 26.7% | 25.1% | 28.4% | 32.5% | 34.8% | 38.3% | 43.9% |
| EGFR inhibitor               | 53.5% | 63.2% | 66.1% | 69.5% | 74.4% | 72.7% | 78.5% | 74.7% |
| BCR-ABL inhibitor            | 13.5% | 12.0% | 11.9% | 12.8% | 15.2% | 16.6% | 20.0% | 21.1% |
| Proteasome inhibitors        | 26.7% | 23.8% | 25.2% | 31.5% | 29.5% | 36.0% | 38.6% | 39.4% |
| Immune check point inhibitor |       |       |       | 25.0% | 53.3% | 40.7% | 42.2% | 42.9% |
| Multikinase inhibitor        | 82.6% | 49.0% | 46.2% | 50.7% | 49.5% | 50.0% | 50.6% | 53.3% |
| VEGFR inhibitor              |       | 16.7% | 41.4% | 48.0% | 38.9% | 38.5% | 40.0% | 41.4% |
| mTOR inhibitor               | 50.0% | 51.1% | 33.8% | 33.7% | 39.0% | 35.5% | 42.2% | 33.3% |
| Total (n=>1000)              | 31.4% | 33.0% | 32.4% | 34.4% | 35.0% | 36.6% | 38.5% | 39.9% |

*VEGF* vascular endothelial growth factor, *CD20* cluster of differentiation, *HER2* human epidermal growth factor receptor, *EGFR* epidermal growth factor receptor, *BCR-ABL* BCR-ABL oncogene, *VEGFR* VEGF receptor, *mTOR* mammalian target of rapamycin

**Supplementary Table S1** List of molecular targeted therapies (MTTs) by type

| Category                                                        | Generic name                                                                             |
|-----------------------------------------------------------------|------------------------------------------------------------------------------------------|
| EGFR inhibitor                                                  | afatinib, cetuximab, dacomitinib, erlotinib, gefitinib, osimertinib, panitumumab         |
| HER2 inhibitor                                                  | lapatinib, pertuzumab, trastuzumab                                                       |
| mTOR inhibitor                                                  | everolimus, temsirolimus                                                                 |
| Multikinase inhibitor                                           | lenvatinib, pazopanib, regorafenib, sorafenib, sunitinib, vandetanib                     |
| VEGF inhibitor                                                  | aflibercept, bevacizumab                                                                 |
| VEGFR inhibitor                                                 | axitinib, ramucirumab                                                                    |
| Anti-CD20 antibody                                              | obinutuzumab, ofatumumab, rituximab                                                      |
| Anti-CD38 antibody                                              | daratumumab                                                                              |
| Anti-CD52 antibody                                              | alemtuzumab                                                                              |
| Bisppecific CD19-directed CD3 T cell engager antibody construct | blinatumomab                                                                             |
| Anti-CCR4 antibody                                              | mogamulizumab                                                                            |
| Immune check point inhibitor                                    | atezolizumab, avelumab, durvalumab, ipilimumab, nivolumab, pembrolizumab                 |
| Anti-SLAMF7 antibody                                            | elotuzumab                                                                               |
| Antibody–drug conjugate (ADC)                                   | brentuximab vedotin, gemtuzumab ozogamicin, inotuzumab ozogamicin, trastuzumab emtansine |
| Radioisotope-labeled antibody                                   | ibritumomab tiuxetan                                                                     |
| BCR-ABL inhibitor                                               | bosutinib, dasatinib, imatinib, nilotinib, ponatinib                                     |
| FLT3-AXL inhibitor                                              | gilteritinib                                                                             |
| Proteasome inhibitors                                           | bortezomib, carfilzomib, ixazomib                                                        |
| ALK inhibitor                                                   | alectinib, ceritinib, crizotinib, lorlatinib                                             |
| BTK inhibitor                                                   | ibrutinib                                                                                |
| JAK inhibitor                                                   | ruxolitinib                                                                              |
| BRAF inhibitor                                                  | dabrafenib, encorafenib, vemurafenib                                                     |
| MEK inhibitor                                                   | binimetinib trametinib                                                                   |
| CDK 4/6 inhibitor                                               | abemaciclib, palbociclib                                                                 |
| PARP inhibitor                                                  | olaparib                                                                                 |
| Histone deacetylase inhibitors                                  | panobinostat, romidepsin, vorinostat                                                     |
| Retinoid                                                        | bexarotene, tamibarotene, tretinoin                                                      |

*EGFR* epidermal growth factor receptor, *HER2* human epidermal growth factor receptor, *mTOR* mammalian target of rapamycin, *VEGF* vascular endothelial growth factor, *VEGFR* VEGF receptor, *CD* cluster of differentiation, *CCR4* CC chemokine receptor 4, *SLAMF7* signaling lymphocytic activation molecule F7, *BCR-ABL* oncogene, *FLT3-AXL* FMS-like tyrosine kinase 3/receptor tyrosine kinase AXL, *ALK* anaplastic lymphoma kinase, *BTK* Bruton's tyrosine kinase, *JAK* Janus kinase, *BRAF* B-raf oncogene, *MEK*, Mitogen-activated extracellular signalregulated kinase, *CDK 4/6* cyclin-dependent kinases 4/6, *PARP* poly (ADP-ribose) polymerase

**Supplementary Table S2** Clinical characteristics (most frequent cancer diagnoses) in all patients and subgroups

| ICD10 Code | Disease name                                                                                          | Overall* <sup>1</sup> ,<br>n, %* <sup>2</sup> |       | All<br>(no moisturizer),<br>n, % |       | All<br>(with moisturizer),<br>n, % |       | Heparinoid,<br>n, % |       | Petrolatum,<br>n, % |       | Urea,<br>n, % |       | Combination,<br>n, % |       |
|------------|-------------------------------------------------------------------------------------------------------|-----------------------------------------------|-------|----------------------------------|-------|------------------------------------|-------|---------------------|-------|---------------------|-------|---------------|-------|----------------------|-------|
| C76-C80    | Malignant neoplasms of ill-defined, secondary and unspecified sites                                   | 31,387                                        | 40.1% | 17,213                           | 54.8% | 14,174                             | 45.2% | 10,720              | 75.6% | 1567                | 11.1% | 1480          | 10.4% | 407                  | 2.9%  |
| C81-C96    | Malignant neoplasms, stated or presumed to be primary, of lymphoid, haematopoietic and related tissue | 27,108                                        | 34.7% | 20,581                           | 75.9% | 6527                               | 24.1% | 3915                | 60.0% | 1751                | 26.8% | 739           | 11.3% | 122                  | 1.9%  |
| C15-C26    | Malignant neoplasms of digestive organs                                                               | 21,183                                        | 27.1% | 11,509                           | 54.3% | 9674                               | 45.7% | 7550                | 78.0% | 818                 | 8.5%  | 1012          | 10.5% | 294                  | 3.0%  |
| C50        | Malignant neoplasm of breast                                                                          | 14,583                                        | 18.7% | 9881                             | 67.8% | 4702                               | 32.2% | 3489                | 74.2% | 619                 | 13.2% | 478           | 10.2% | 116                  | 2.5%  |
| C30-C39    | Malignant neoplasms of respiratory and intrathoracic organs                                           | 13,090                                        | 16.7% | 6820                             | 52.1% | 6270                               | 47.9% | 4880                | 77.8% | 735                 | 11.7% | 505           | 8.1%  | 150                  | 2.4%  |
| C64-C68    | Malignant neoplasms of urinary tract                                                                  | 2656                                          | 3.4%  | 1446                             | 54.4% | 1210                               | 45.6% | 761                 | 62.9% | 114                 | 9.4%  | 291           | 24.0% | 44                   | 3.6%  |
| C51-C58    | Malignant neoplasms of female genital organs                                                          | 2271                                          | 2.9%  | 1653                             | 72.8% | 618                                | 27.2% | 461                 | 74.6% | 83                  | 13.4% | 48            | 7.8%  | 26                   | 4.2%  |
| C60-C63    | Malignant neoplasms of male genital organs                                                            | 1019                                          | 1.3%  | 656                              | 64.4% | 363                                | 35.6% | 260                 | 71.6% | 60                  | 16.5% | 36            | 9.9%  | 7                    | 1.9%  |
| C45-C49    | Malignant neoplasms, mesothelial and soft tissue                                                      | 734                                           | 0.9%  | 488                              | 66.5% | 246                                | 33.5% | 173                 | 70.3% | 35                  | 14.2% | 25            | 10.2% | 13                   | 5.3%  |
| C73-C75    | Malignant neoplasms of thyroid and other endocrine glands                                             | 574                                           | 0.7%  | 327                              | 57.0% | 247                                | 43.0% | 170                 | 68.8% | 26                  | 10.5% | 33            | 13.4% | 18                   | 7.3%  |
| C69-C72    | Malignant neoplasms of eye, brain, and other parts of central nervous system                          | 545                                           | 0.7%  | 373                              | 68.4% | 172                                | 31.6% | 114                 | 66.3% | 46                  | 26.7% | 8             | 4.7%  | 4                    | 2.3%  |
| C00-C14    | Malignant neoplasms of lip, oral cavity and pharynx                                                   | 527                                           | 0.7%  | 243                              | 46.1% | 284                                | 53.9% | 215                 | 75.7% | 39                  | 13.7% | 19            | 6.7%  | 11                   | 3.9%  |
| C43-C44    | Melanoma and other malignant neoplasms of skin                                                        | 263                                           | 0.3%  | 148                              | 56.3% | 115                                | 43.7% | 82                  | 71.3% | 24                  | 20.9% | 8             | 7.0%  | 1                    | 0.9%  |
| C40-C41    | Malignant neoplasms of bone and articular cartilage                                                   | 82                                            | 0.1%  | 64                               | 78.0% | 18                                 | 22.0% | 13                  | 72.2% | 3                   | 16.7% | 0             | 0.0%  | 2                    | 11.1% |
| Total*     |                                                                                                       | 116,022                                       |       | 71,402                           | 61.5% | 44,620                             | 38.5% | 32,803              | 73.5% | 5920                | 13.3% | 4682          | 10.5% | 1215                 | 2.7%  |

\*<sup>1</sup> A patient diagnosed with  $\geq$  two cancer categories was counted in each category. *ICD10* International Classification of Diseases version 10

\*<sup>2</sup> Percentage of overall was calculated by number of patients in each group / study cohort (78,190)

**Supplementary Table S3** Duration of MTT by MTT group during the follow-up period (in days)

| MTT group                                                      | Administration | Overall |               | All (no moisturizer) |                 | All (with moisturizer) |                 | Heparinoid |                 | Petrolatum |                 | Urea |                 | Combination |                 |
|----------------------------------------------------------------|----------------|---------|---------------|----------------------|-----------------|------------------------|-----------------|------------|-----------------|------------|-----------------|------|-----------------|-------------|-----------------|
|                                                                |                | n       | Mean (SD)     | n                    | Mean (SD)       | n                      | Mean (SD)       | n          | Mean (SD)       | n          | Mean (SD)       | n    | Mean (SD)       | n           | Mean (SD)       |
| ALK inhibitor                                                  | Oral           | 846     | 284.9 (106.2) | 661                  | 291.16 (101.72) | 185                    | 262.52 (118.51) | 151        | 261.3 (118.3)   | 20         | 254.55 (122.95) | 10   | 294.00 (105.64) | 4           | 269.25 (169.74) |
| BCR-ABL inhibitor                                              | Oral           | 6412    | 300.4 (93.7)  | 5422                 | 308.80 (87.55)  | 990                    | 254.62 (111.21) | 673        | 258.4 (110.1)   | 186        | 235.04 (113.30) | 115  | 262.04 (115.59) | 16          | 269.25 (84.02)  |
| BRAF inhibitor                                                 | Oral           | 17      | 141.5 (98.9)  | 10                   | 139.00 (91.26)  | 7                      | 145.00 (116.54) | 2          | 60.5 (84.2)     | 4          | 166.00 (130.56) | 1    | 230.00          | 0           | -               |
| BTK inhibitor                                                  | Oral           | 90      | 187.6 (137.7) | 65                   | 217.78 (138.74) | 25                     | 109.04 (100.43) | 15         | 118.6 (105.7)   | 5          | 147.00 (114.46) | 4    | 46.00 (26.62)   | 1           | 28.00           |
| Bispecific CD19-directed CD3 T cell engager antibody construct | Injection      | 1       | 62.0          | 0                    | -               | 1                      | 62.00           | 0          | -               | 1          | 62.00           | 0    | -               | 0           | -               |
| CDK 4/6 inhibitor                                              | Oral           | 474     | 124.8 (87.2)  | 313                  | 133.31 (90.32)  | 161                    | 108.29 (78.45)  | 112        | 108.4 (77.7)    | 29         | 117.00 (85.25)  | 17   | 98.00 (79.97)   | 3           | 77.33 (30.29)   |
| EGFR inhibitor                                                 | Oral           | 5818    | 243.4 (111.9) | 1901                 | 225.45 (120.29) | 3917                   | 252.09 (106.44) | 3150       | 254.6 (105.6)   | 315        | 243.83 (110.61) | 332  | 242.48 (107.64) | 120         | 233.98 (110.17) |
|                                                                | Injection      | 2959    | 11.5 (9.6)    | 358                  | 8.99 (8.77)     | 2601                   | 11.86 (9.67)    | 2228       | 11.8 (9.5)      | 127        | 11.59 (10.24)   | 138  | 13.07 (10.80)   | 108         | 12.29 (10.26)   |
| FLT3-AXL inhibitor                                             | Oral           | 1       | 18.0          | 1                    | 18.00           | 0                      | -               | 0          | -               | 0          | -               | 0    | -               | 0           | -               |
| HER2 inhibitor                                                 | Oral           | 327     | 127.0 (106.3) | 111                  | 147.83 (123.69) | 216                    | 116.24 (94.69)  | 152        | 113.1 (96.5)    | 18         | 108.44 (72.77)  | 37   | 123.32 (93.03)  | 9           | 156.33 (112.41) |
|                                                                | Injection      | 12,085  | 15.1 (6.4)    | 8114                 | 15.24 (6.55)    | 3971                   | 14.80 (6.20)    | 3035       | 14.8 (6.0)      | 447        | 14.68 (6.82)    | 392  | 15.06 (7.19)    | 97          | 15.13 (5.35)    |
| JAK inhibitor                                                  | Oral           | 458     | 302.0 (100.2) | 409                  | 306.81 (97.63)  | 49                     | 261.67 (113.15) | 35         | 251.23 (115.65) | 13         | 283.46 (109.16) | 1    | 344.00          | 0           | -               |
| MEK inhibitor                                                  | Oral           | 15      | 116.3 (97.2)  | 9                    | 118.44 (98.78)  | 6                      | 113.00 (103.98) | 2          | 49.50 (68.59)   | 3          | 116.33 (117.41) | 1    | 230.00          | 0           | -               |
| PARP inhibitor                                                 | Oral           | 30      | 98.4 (75.6)   | 21                   | 103.33 (76.28)  | 9                      | 86.89 (77.27)   | 9          | 86.89 (77.27)   | 0          | -               | 0    | -               | 0           | -               |
| VEGFR inhibitor                                                | Oral           | 837     | 188.6 (119.2) | 391                  | 199.64 (118.15) | 446                    | 178.88 (119.34) | 250        | 179.22 (115.64) | 36         | 143.36 (114.87) | 144  | 187.83 (125.22) | 16          | 173.06 (128.10) |
|                                                                | Injection      | 2909    | 8.9 (6.9)     | 1598                 | 9.64 (7.29)     | 1311                   | 7.95 (6.18)     | 1036       | 7.99 (6.28)     | 147        | 7.37 (5.40)     | 101  | 8.65 (6.49)     | 27          | 6.78 (4.65)     |
| VEGF inhibitor                                                 | Injection      | 21,102  | 11.5 (6.5)    | 12,260               | 11.64 (6.49)    | 8842                   | 11.22 (6.43)    | 6788       | 11.28 (6.43)    | 959        | 10.28 (6.37)    | 846  | 11.82 (6.44)    | 249         | 11.20 (6.13)    |
| mTOR inhibitor                                                 | Oral           | 1379    | 171.1 (117.8) | 829                  | 181.76 (118.90) | 550                    | 154.93 (114.21) | 373        | 161.82 (115.89) | 66         | 147.97 (112.96) | 99   | 137.67 (108.58) | 12          | 121.75 (102.77) |
|                                                                | Injection      | 114     | 16.4 (13.8)   | 43                   | 18.56 (14.64)   | 71                     | 15.15 (13.13)   | 47         | 14.79 (12.78)   | 9          | 19.44 (15.22)   | 13   | 15.31 (13.70)   | 2           | 3.50 (3.54)     |
| Histone deacetylase inhibitors                                 | Oral           | 66      | 41.3 (69.8)   | 42                   | 32.43 (54.28)   | 24                     | 56.79 (90.05)   | 13         | 62.46 (94.21)   | 7          | 69.57 (109.18)  | 4    | 16.00 (9.38)    | 0           | -               |
|                                                                | Injection      | 4       | 3.0 (1.4)     | 2                    | 2.00 (1.41)     | 2                      | 4.00 (0.00)     | 2          | 4.00 (0.00)     | 0          | -               | 0    | -               | 0           | -               |

|                               |           |        |                  |        |                    |      |                    |      |                    |      |                    |     |                    |     |                    |
|-------------------------------|-----------|--------|------------------|--------|--------------------|------|--------------------|------|--------------------|------|--------------------|-----|--------------------|-----|--------------------|
| Proteasome inhibitors         | Oral      | 176    | 14.6<br>(11.6)   | 111    | 15.17<br>(11.55)   | 65   | 13.48<br>(11.62)   | 46   | 15.00<br>(12.15)   | 13   | 9.54<br>(10.37)    | 5   | 10.40<br>(9.10)    | 1   | 10.00              |
|                               | Injection | 4064   | 22.7<br>(12.9)   | 2738   | 23.46<br>(12.90)   | 1326 | 21.23<br>(12.70)   | 758  | 21.34<br>(12.76)   | 365  | 20.82<br>(12.59)   | 179 | 22.12<br>(12.84)   | 24  | 17.42<br>(11.11)   |
| Multikinase inhibitor         | Oral      | 3233   | 154.0<br>(115.8) | 1408   | 171.49<br>(117.82) | 1825 | 140.41<br>(112.46) | 1159 | 134.25<br>(112.16) | 135  | 150.82<br>(108.55) | 429 | 154.89<br>(112.93) | 102 | 135.67<br>(113.96) |
| Retinoid                      | Oral      | 568    | 76.9<br>(58.3)   | 306    | 71.52<br>(52.80)   | 262  | 83.22<br>(63.60)   | 114  | 80.29<br>(58.59)   | 117  | 86.13<br>(63.76)   | 26  | 70.81<br>(65.53)   | 5   | 146.60<br>(125.45) |
| Anti CCR4 antibody            | Injection | 220    | 6.51<br>(3.14)   | 55     | 6.60<br>(3.13)     | 165  | 6.48<br>(3.15)     | 99   | 6.49<br>(2.83)     | 47   | 6.02 (3.68)        | 18  | 7.50 (3.31)        | 1   | 8.00               |
| Anti CD20 antibody            | Injection | 17,632 | 6.1 (2.4)        | 13,526 | 6.07<br>(2.34)     | 4106 | 6.14<br>(2.45)     | 2484 | 6.17<br>(2.46)     | 1095 | 6.06 (2.40)        | 451 | 6.25 (2.50)        | 76  | 5.99 (2.69)        |
| Anti CD38 antibody            | Injection | 153    | 10.8 (6.2)       | 85     | 11.45<br>(5.80)    | 68   | 10.00<br>(6.50)    | 41   | 10.51<br>(6.82)    | 18   | 8.22 (5.76)        | 7   | 10.86<br>(6.62)    | 2   | 12.50<br>(7.78)    |
| AntiCD52 antibody             | Injection | 4      | 23.3<br>(12.8)   | 2      | 20.50<br>(16.26)   | 2    | 26.00<br>(14.14)   | 1    | 36.00              | 1    | 16.00              | 0   | -                  | 0   | -                  |
| Anti SLAMF7 antibody          | Injection | 124    | 14.4 (8.2)       | 86     | 15.33<br>(8.50)    | 38   | 12.39<br>(7.00)    | 28   | 12.79<br>(6.97)    | 7    | 12.57<br>(8.04)    | 2   | 7.00 (7.07)        | 1   | 11.00              |
| Antibody–drug conjugate (ADC) | Injection | 838    | 5.8 (4.4)        | 482    | 6.30<br>(4.68)     | 356  | 5.19<br>(3.99)     | 245  | 5.31<br>(3.99)     | 78   | 5.01 (4.19)        | 24  | 4.75 (2.98)        | 9   | 4.67 (4.85)        |
| Radioisotope-labeled antibody | Injection | 135    | 1.9 (0.3)        | 111    | 1.95<br>(0.25)     | 24   | 1.88<br>(0.34)     | 14   | 1.93<br>(0.27)     | 4    | 1.75 (0.50)        | 5   | 1.80 (0.45)        | 1   | 2.00               |
| Immune check point inhibitor  | Injection | 3984   | 10.5 (7.4)       | 2261   | 10.87<br>(7.62)    | 1723 | 9.96<br>(7.06)     | 1340 | 10.29<br>(7.17)    | 248  | 8.40 (6.42)        | 104 | 9.05 (6.55)        | 31  | 11.35<br>(7.05)    |

*EGFR* epidermal growth factor receptor, *HER2* human epidermal growth factor receptor, *mTOR* mammalian target of rapamycin, *VEGF* vascular endothelial growth factor, *VEGFR* VEGF receptor, *CD* cluster of differentiation, *CCR4* CC chemokine receptor 4, *SLAMF7* signaling lymphocytic activation molecule F7, *BCR-ABL* BCR-ABL oncogene, *FLT3-AXL* FMS-like tyrosine kinase 3/receptor tyrosine kinase *AXL*, *ALK* anaplastic lymphoma kinase, *BTK* Bruton's tyrosine kinase, *JAK* Janus kinase, *BRAF* B-raf oncogene, *MEK*, Mitogen-activated extracellular signalregulated kinase, *CDK 4/6* cyclin-dependent kinases, *PARP* poly (ADP-ribose) polymerase



**Supplementary Table S4** Proportion of patients treated with radiotherapy and descriptive statistics of the duration during the follow-up period

| Variable               | Overall |               | All<br>(no moisturizer) |               | All<br>(with moisturizer) |               |
|------------------------|---------|---------------|-------------------------|---------------|---------------------------|---------------|
| Radiotherapy, N (%)    |         |               |                         |               |                           |               |
| Yes                    | 7,801   | 10.0%         | 4,284                   | 8.5%          | 3,517                     | 12.6%         |
| No                     | 70,389  | 90.0%         | 46,000                  | 91.5%         | 24,389                    | 87.4%         |
| Number of radiotherapy |         |               |                         |               |                           |               |
| Valid values           |         | 7801          |                         | 4284          |                           | 3517          |
| Mean (Sd)              |         | 22.77 (12.75) |                         | 22.55 (12.29) |                           | 23.04 (13.30) |
| 95% CI                 |         | 22.49–23.05   |                         | 22.19–22.92   |                           | 22.60–23.48   |
| Median                 |         | 20            |                         | 20            |                           | 22            |
| Q1-Q3                  |         | 15-26         |                         | 15-25         |                           | 13-28         |

**Supplementary Table S5** Cost (in JPY) analysis during the first 6 months of follow-up and for the entire 12 months of follow-up

|                                      | Group N  |                          |                         |                          | Group M  |                          |                         |                          |
|--------------------------------------|----------|--------------------------|-------------------------|--------------------------|----------|--------------------------|-------------------------|--------------------------|
|                                      | <i>n</i> | Mean (SD)                | 95% CI                  | % of total medical costs | <i>n</i> | Mean (SD)                | 95% CI                  | % of total medical costs |
| <b>First 6 months of follow-up</b>   |          |                          |                         |                          |          |                          |                         |                          |
| Total medical costs                  | 50,284   | 3,298,769<br>(2,069,605) | 3280679–<br>3316859     |                          | 27,906   | 3,766,163<br>(2,317,206) | 3,738,975–<br>3,793,352 |                          |
| Outpatient costs                     | 49,598   | 2,126,359<br>(1,729,972) | 2,111,134–<br>2,141,584 | 64.5%                    | 27,246   | 2,087,803<br>(1,764,503) | 2,066,851–<br>2,108,756 | 55.4%                    |
| Inpatient costs                      | 32,117   | 1,881,002<br>(1,948,841) | 1,859,688–<br>1,902,317 | 57.0%                    | 20,912   | 2,305,579<br>(2,393,697) | 2,273,134–<br>2,338,024 | 61.2%                    |
| Drug costs                           | 50,284   | 2,509,235<br>(1,757,068) | 2,493,877–<br>2,524,593 | 76.1%                    | 27,906   | 2,659,022<br>(1,812,180) | 2,637,760–<br>2,680,285 | 70.6%                    |
| Defined MTT costs                    | 50,284   | 1,895,454<br>(1,617,171) | 1,881,319–<br>1,909,589 | 57.5%                    | 27,906   | 1,912,357<br>(1,665,631) | 1,892,814–<br>1,931,900 | 50.8%                    |
| Moisturizer costs                    | 0        | -                        | -                       |                          | 20,656   | 4008<br>(7,453)          | 3906–4109               | 0.1%                     |
| Other drug costs                     | 49,564   | 622,697<br>(777,848)     | 615,849–<br>629,545     | 18.9%                    | 27,864   | 744,820<br>(883,418)     | 734,447–<br>755,193     | 19.8%                    |
| Radiotherapy costs                   | 2893     | 269,379<br>(144,226)     | 264,121–<br>274,637     | 8.2%                     | 2176     | 274,839<br>(161,086)     | 268,067–<br>281,611     | 7.3%                     |
| <b>Entire 12 months of follow-up</b> |          |                          |                         |                          |          |                          |                         |                          |
| Total medical costs                  | 50,284   | 5,135,243<br>(3,395,783) | 5,105,562–<br>5,164,925 | 100.0%                   | 27,906   | 6,164,555<br>(3,687,885) | 6,121,284–<br>6,207,826 | 100.0%                   |
| Outpatient costs                     | 50,175   | 3,535,744<br>(3,039,421) | 3,509,149–<br>3,562,339 | 68.9%                    | 27,774   | 3,593,280<br>(2,962,900) | 3,558,433–<br>3,628,127 | 58.3%                    |
| Inpatient costs                      | 34,939   | 2,313,020<br>(2,556,791) | 2,286,210–<br>2,339,831 | 45.0%                    | 22,995   | 3,141,044<br>(3,418,671) | 3,096,856–<br>3,185,233 | 51.0%                    |
| Drug costs                           |          |                          |                         |                          |          |                          |                         |                          |
| Defined MTT costs                    | 50,284   | 2,960,789<br>(2,772,164) | 2,936,559–<br>2,985,020 | 57.7%                    | 27,906   | 3,079,287<br>(2,722,818) | 3,047,340–<br>3,111,235 | 50.0%                    |
| Moisturizer costs                    | 0        | -                        | -                       |                          | 27,906   | 6033<br>(12,344)         | 5888–6178               | 0.1%                     |
| Other drug costs                     | 49,808   | 979,841<br>(1,291,595)   | 968,498–<br>991,184     | 19.1%                    | 27,898   | 1,246,769<br>(1,469,595) | 1,229,524–<br>1,264,015 | 20.2%                    |
| Radiotherapy costs                   | 4284     | 283,912<br>(151,318)     | 279,379–<br>288,444     | 5.5%                     | 3517     | 289,301<br>(166,077)     | 283,811–<br>294,792     | 4.7%                     |

**Supplementary Table S6** Number of patients receiving moisturizers and the total amount of moisturizer prescribed in each year

| <b>Year</b> | <b>Total (n)</b> | <b>With moisturizer (n)</b> | <b>% with moisturizer</b> | <b>Total amount of moisturizer (g)</b> | <b>Mean (g)</b> |
|-------------|------------------|-----------------------------|---------------------------|----------------------------------------|-----------------|
| 2011        | 751              | 237                         | 31.6%                     | 73,462                                 | 310             |
| 2012        | 5547             | 1824                        | 32.9%                     | 606,297                                | 332             |
| 2013        | 8719             | 2836                        | 32.5%                     | 969,042                                | 342             |
| 2014        | 12215            | 4194                        | 34.3%                     | 1,457,762                              | 348             |
| 2015        | 12079            | 4218                        | 34.9%                     | 1,526,698                              | 362             |
| 2016        | 15549            | 5652                        | 36.3%                     | 2,153,689                              | 381             |
| 2017        | 18228            | 6949                        | 38.1%                     | 2,932,977                              | 422             |
| 2018        | 5102             | 1996                        | 39.1%                     | 756,719                                | 379             |

2011: Data from October to December

2018: Data from January to April
